# Supplementary material for: Primaquine Inhibits the Endosomal Trafficking and Nuclear Localization of EGFR and Induces the Apoptosis of Breast Cancer Cells by Nuclear EGFR/Stat3-Mediated c-Myc Downregulation
Source: MDPI journal article supplement (doi:10.3390/ijms222312961), 2021-11-30
Supplement: s1 [file s1]

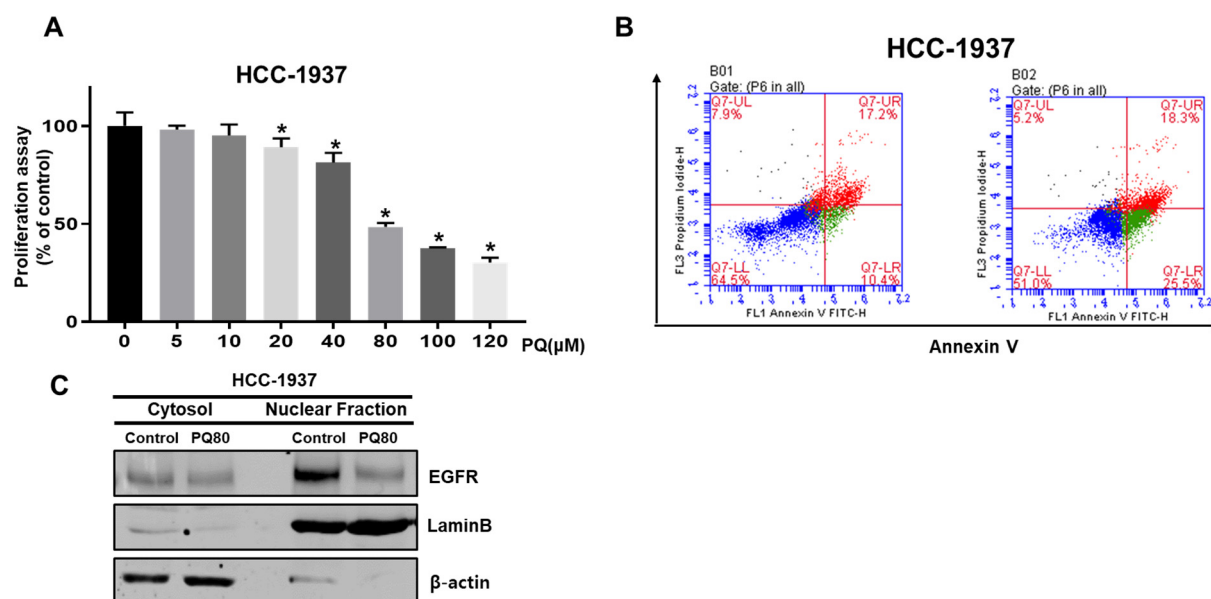

**Supplementary Figure S1.** Effect of primaquine on breast cancer, TNBC HCC-1937. **(A)** The proliferation of breast cancer cells, HCC-1937 was measured using an MTS assay kit, CellTiter 96 Aqueous One Solution kit. Breast cancer cells were incubated in 96-well plates in the presence of primaquine (0, 5, 10, 20, 40, 80, 100, and 120  $\mu$ M and DMSO). Values are the mean  $\pm$  SD of 3 independent experiments. \* $p$  < 0.05 vs. control. **(B)** PQ (control and 80  $\mu$ M) induced the apoptosis of cancer cells (HCC-1937). Cells undergoing PQ-induced apoptosis were analyzed by using an annexin V-PI staining kit. **(C)** Western blot of EGFR in HCC-1937 under PQ treatment (control or 80  $\mu$ M). Cytosolic and nuclear EGFR were analyzed by Western blot. Internal control of cytosol and nuclear fraction were used as lamin B and  $\beta$ -actin.
